# Supplementary material
Source: MDPI journal article supplement (https://www.mdpi.com/2073-445X/10/2/100)
Supplement: s1 [file s1]

## Supplementary Materials 1

### Code to run the classification in Google Earth Engine

Example of Google Earth Engine script for sea and land classification for the year 2000

#### //MASK CLOUD LANDSAT

```
var cloudMaskL457 = function(image) {  
  var qa = image.select('pixel_qa');  
  
  // If the cloud bit (5) is set and the cloud confidence (7) is high  
  // or the cloud shadow bit is set (3), then it's a bad pixel.  
  
  var cloud = qa.bitwiseAnd(1 << 5)  
    .and(qa.bitwiseAnd(1 << 7))  
    .or(qa.bitwiseAnd(1 << 3));  
  
  // Remove edge pixels that don't occur in all bands  
  
  var mask2 = image.mask().reduce(ee.Reducer.min());  
  
  return image.updateMask(cloud.not()).updateMask(mask2).clip(jawatimur);  
};
```

#### //LOAD LANDSAT 7 DATA

```
var lan7 = ee.ImageCollection('LANDSAT/LE07/C01/T1_SR')  
  .filterBounds(jawatimur)  
  .map(cloudMaskL457);  
  
print(lan7, 'landsat_7_2000');  
  
var land72000 = lan7.filterDate('2000-01-01', '2001-01-01');  
  
var medianl72000 = land72000.median();  
  
var ndwil72000 = medianl72000.normalizedDifference(['B2', 'B4']).rename('ndwil72000');  
  
var ndvil72000 = medianl72000.normalizedDifference(['B4', 'B3']).rename('ndvil72000');  
  
var awei72000 = medianl72000.expression('4 * (GREEN - SWIR1) - ( 0.25 * NIR ) + (2.75 * SWIR2)', {  
  'GREEN': medianl72000.select('B2'),  
  'NIR': medianl72000.select('B4'),  
  'SWIR1': medianl72000.select('B5'),  
  'SWIR2': medianl72000.select('B7'),  
}).rename('awei72000');  
  
var compositel72000 = ee.Image.cat(medianl72000,ndwil72000,ndvil72000,awei72000);
```

#### //TRAINING SAMPLE AND INPUT

```

var finalI72000 = ee.Image.cat(compositeI72000);

var bandsI72000 = ['B1', 'B2', 'B3', 'B4', 'B5', 'B7', 'ndwiI72000', 'ndviI72000', 'awei72000'];

var trainingI72000 = finalI72000.select(bandsI72000).sampleRegions({
  collection : newfc2000,
  properties : ['landcover'],
  scale : 30,
  tileScale : 8,
  geometries : true
});

```

### //TRAIN CLASSIFICATION

```

var classifierI72000 = ee.Classifier.gmoMaxEnt().train({
  features:trainingI72000,
  classProperty: 'landcover',
  inputProperties: bandsI72000,
});

var classifierI72000rf = ee.Classifier.smileRandomForest(50).train({
  features:trainingI72000,
  classProperty: 'landcover',
  inputProperties: bandsI72000,
});

var classifierI72000rf2 = ee.Classifier.smileRandomForest(80).train({
  features:trainingI72000,
  classProperty: 'landcover',
  inputProperties: bandsI72000,
});

```

### //RUN CLASSIFICATION

```

var classifiedI72000 = finalI72000.select(bandsI72000).classify(classifierI72000);

var classifiedI72000rf = finalI72000.select(bandsI72000).classify(classifierI72000rf);

var classifiedI72000rf2 = finalI72000.select(bandsI72000).classify(classifierI72000rf2);

```

# GOOGLE EARTH ENGINE SCRIPT FOR SEA AND LAND CLASSIFICATION FOR 2005 CLASSIFICATION USING LANDSAT 7 ETM

## //MASK CLOUD LANDSAT

```
var cloudMaskL457 = function(image) {  
  var qa = image.select('pixel_qa');  
  
  // If the cloud bit (5) is set and the cloud confidence (7) is high  
  
  // or the cloud shadow bit is set (3), then it's a bad pixel.  
  
  var cloud = qa.bitwiseAnd(1 << 5)  
    .and(qa.bitwiseAnd(1 << 7))  
    .or(qa.bitwiseAnd(1 << 3));  
  
  // Remove edge pixels that don't occur in all bands  
  
  var mask2 = image.mask().reduce(ee.Reducer.min());  
  
  return image.updateMask(cloud.not()).updateMask(mask2).clip(jawatimur);  
};
```

## //LOAD LANDSAT 7 DATA

```
var lan7 = ee.ImageCollection('LANDSAT/LE07/C01/T1_SR')  
  .filterBounds(jawatimur)  
  .map(cloudMaskL457);  
  
var land72005 = lan7.filterDate('2005-01-01', '2006-01-01');  
  
var medianl72005 = land72005.median();  
  
var ndwil72005 = medianl72005.normalizedDifference(['B2', 'B4']).rename('ndwil72005');  
  
var ndvil72005 = medianl72005.normalizedDifference(['B4', 'B3']).rename('ndvil72005');  
  
var awel72005 = medianl72005.expression('4 * (GREEN - SWIR1) - ( 0.25 * NIR ) + (2.75 * SWIR2)', {  
  'GREEN': medianl72005.select('B2'),  
  'NIR': medianl72005.select('B4'),  
  'SWIR1': medianl72005.select('B5'),  
  'SWIR2': medianl72005.select('B7'),  
}).rename('awel72005');  
  
var compositel72005 = ee.Image.cat(medianl72005, ndwil72005, ndvil72005, awel72005);  
  


## //TRAINING SAMPLE AND INPUT

  
var finall72005 = ee.Image.cat(compositel72005);
```

```

var bandsl72005 = ['B1', 'B2', 'B3', 'B4', 'B5', 'B7', 'ndwil72005', 'ndvil72005', 'awel72005'];

var trainingl72005 = finall72005.select(bandsl72005).sampleRegions({

  collection : newfc2005,

  properties : ['landcover'],

  scale : 30,

  tileScale : 8,

  geometries : true,

});

```

### **//TRAIN CLASSIFICATION**

```

//var classifierl72005 = ee.Classifier.gmoMaxEnt().train({

//features:trainingl72005,

// classProperty: 'landcover',

// inputProperties: bandsl72005,

//});

var classifierl72005rf1 = ee.Classifier.smileRandomForest(50).train({

features:trainingl72005,

classProperty: 'landcover',

inputProperties: bandsl72005,

});

var classifierl72005rf2 = ee.Classifier.smileRandomForest(80).train({

features:trainingl72005,

classProperty: 'landcover',

inputProperties: bandsl72005,

});

```

### **//RUN CLASSIFICATION**

```

//var classifiedl72005 = finall72005.select(bandsl72005).classify(classifierl72005);

var classifiedl72005rf = finall72005.select(bandsl72005).classify(classifierl72005rf1);

var classifiedl72005rf2 = finall72005.select(bandsl72005).classify(classifierl72005rf2);

```

# GOOGLE EARTH ENGINE SCRIPT FOR SEA AND LAND CLASSIFICATION FOR 2010 USING LANDSAT 7 AND ALOS PALSAR

## //CLOUD MASKING

```
var cloudMaskL457 = function(image) {  
  var qa = image.select('pixel_qa');  
  
  // If the cloud bit (5) is set and the cloud confidence (7) is high  
  // or the cloud shadow bit is set (3), then it's a bad pixel.  
  
  var cloud = qa.bitwiseAnd(1 << 5)  
    .and(qa.bitwiseAnd(1 << 7))  
    .or(qa.bitwiseAnd(1 << 3));  
  
  // Remove edge pixels that don't occur in all bands  
  
  var mask2 = image.mask().reduce(ee.Reducer.min());  
  
  return image.updateMask(cloud.not()).updateMask(mask2).clip(jawatimur);  
};
```

## //LOAD ALOS

```
var dataset = ee.ImageCollection('JAXA/ALOS/PALSAR/YEARLY/SAR').filterBounds(jawatimur)  
  .filter(ee.Filter.date('2010-01-01', '2011-01-01'));  
  
var sarHh = dataset.select('HH');  
  
var HHmed = sarHh.median();  
  
var sarHv = dataset.select('HV');  
  
//var sarHhVis = {  
  // min: 0.0,  
  // max: 10000.0,  
  //};  
  
var HVmed = sarHv.median();
```

## //LOAD LANDSAT 7

```
var check = ee.ImageCollection('LANDSAT/LE07/C01/T1_SR')  
  .filterBounds(jawatimur)  
  .filterDate('2010-01-01', '2011-01-01')  
  .map(cloudMaskL457)  
  .filterBounds(jawatimur);  
  
var medianL72010 = check.median();
```

```

var ndvil72010 = medianl72010.normalizedDifference(['B4','B3']).rename('ndvil72010');
var ndwil72010 = medianl72010.normalizedDifference(['B2','B4']).rename('ndwil72010');
var awel72010 = medianl72010.expression('4 * (GREEN - SWIR1) - ( 0.25 * NIR ) + (2.75 * SWIR2)', {
  'GREEN': medianl72010.select('B2'),
  'NIR': medianl72010.select('B4'),
  'SWIR1': medianl72010.select('B5'),
  'SWIR2': medianl72010.select('B7'),
}).rename('awel72010');

```

### //EQUALIZE PROJECTION AND SPATIAL RESOLUTION LANDSAT 7 AS REFERENCE

```

var hhpro = HHmed
  // Force the next reprojection to aggregate instead of resampling.
  .reproject(l7Projection, null, 30)
  .reduceResolution({
    reducer: ee.Reducer.mean(),
    maxPixels: 1024
  });
var hvpro = HVmed
  // Force the next reprojection to aggregate instead of resampling.
  .reproject(l7Projection, null, 30)
  .reduceResolution({
    reducer: ee.Reducer.mean(),
    maxPixels: 1024
  });
var compositeland72010 = ee.Image.cat(medianl72010,ndvil72010,ndwil72010,awel72010,hhpro,hvpro);
var finall72010 = ee.Image.cat(compositeland72010);
var bandsl72010 = ['B1', 'B2', 'B3', 'B4', 'B5', 'B7', 'ndvil72010', 'ndwil72010','awel72010', 'HH', 'HV'];
var trainingl72010 = finall72010.select(bandsl72010).sampleRegions({
  collection : newfc2010,
  properties : ['landcover'],
  scale : 30, });
var classifierl72010 = ee.Classifier.gmoMaxEnt().train({
  features:trainingl72010,
  classProperty: 'landcover',

```

```
inputProperties: bandsl72010,
});

var classifierl72010rf = ee.Classifier.smileRandomForest(50).train({
features:trainingl72010,
classProperty: 'landcover',
inputProperties: bandsl72010,
});

var classifierl72010rf2 = ee.Classifier.smileRandomForest(80).train({
features:trainingl72010,
classProperty: 'landcover',
inputProperties: bandsl72010,
});

var classifiedl72010 = finall72010.select(bandsl72010).classify(classifierl72010);
var classifiedl72010rf = finall72010.select(bandsl72010).classify(classifierl72010rf);
var classifiedl72010rf2 = finall72010.select(bandsl72010).classify(classifierl72010rf2);
```

# GOOGLE EARTH ENGINE SCRIPT FOR SEA AND LAND CLASSIFICATION FOR 2015 USING LANDSAT 8 AND SENTINEL 1

## //LOAD SENTINEL 1

```
var collectionVV1 = ee.ImageCollection('COPERNICUS/S1_GRD')

    .filter(ee.Filter.eq('instrumentMode', 'IW'))

    .filter(ee.Filter.listContains('transmitterReceiverPolarisation', 'VV'))

    .filter(ee.Filter.eq('orbitProperties_pass', 'DESCENDING'))

    .filterMetadata('resolution_meters', 'equals', 10)

    .filterBounds(jawatimur)

    .select('VV')

    .map(function(image){return image.clip(jawatimur)});
```

```
var collectionVH = ee.ImageCollection('COPERNICUS/S1_GRD')

    .filter(ee.Filter.eq('instrumentMode', 'IW'))

    .filter(ee.Filter.listContains('transmitterReceiverPolarisation', 'VH'))

    .filter(ee.Filter.eq('orbitProperties_pass', 'DESCENDING'))

    .filterMetadata('resolution_meters', 'equals', 10)

    .filterBounds(jawatimur)

    .select('VH')

    .map(function(image){return image.clip(jawatimur)});
```

## //APPLY SPECKLE FILTER VV (focal median)

```
var filterSpeckles = function(img) {

  var vv = img.select('VV') //select the VV polarization band

  var vv_smoothed = vv.focal_median(50,'circle','meters').rename('VV_Filtered') //Apply a focal median filter

  return img.addBands(vv_smoothed) // Add filtered VV band to original image

};

var filterSpeckles2 = function(img) {

  var vh = img.select('VH') //select polarization band

  var vh_smoothed = vh.focal_median(50,'circle','meters').rename('VV_Filtered') //Apply a focal median filter

  return img.addBands(vh_smoothed) // Add filtered Vh band to original image

};
```

## // filter date (2015) to speckle-noise-filtered data and add median value represents entire year image

```
var S1vv = collectionVV1.map(filterSpeckles);
```



```

var vv2015 = S1vv.filterDate('2015-01-01', '2016-01-01');
var compvv2015 = vv2015.median();
var S1vh = collectionVH.map(filterSpeckles2);
var vh2015 = S1vh.filterDate('2015-01-01', '2016-01-01');
var compvh2015 = vh2015.median();

//CLOUD MASK LANDSAT 8

var cloudShadowBitMask = 1 << 3;
var cloudsBitMask = 1 << 5;

// Get the pixel QA band.
var qa = image.select('pixel_qa');

// Both flags should be set to zero, indicating clear conditions.
var mask = qa.bitwiseAnd(cloudShadowBitMask).eq(0)
.and(qa.bitwiseAnd(cloudsBitMask).eq(0));

// Return the masked image, scaled to reflectance, without the QA bands.
return image.updateMask(mask).clip(jawatimur).divide(10000)
.select("B[0-9]*")
.copyProperties(image, ["system:time_start"]);
}

```

## //LOAD LANDSAT 8

```

var landsat = ee.ImageCollection('LANDSAT/LC08/C01/T1_SR')
.filterBounds(jawatimur)
.map(maskL8sr);
var landsat2015 = landsat.filterDate('2015-01-01', '2016-01-01');

    print(landsat2015);

var median2015 = landsat2015.median();

var ndvi2015 = median2015.normalizedDifference(['B5', 'B4']).rename('NDVI');
var ndwi2015 = median2015.normalizedDifference(['B3', 'B5']).rename('NDWI');
var awel82015 = median2015.expression('4 * (GREEN - SWIR1) - ( 0.25 * NIR ) + (2.75 * SWIR2)', {
  'GREEN': median2015.select('B3'),
  'NIR': median2015.select('B5'),
  'SWIR1': median2015.select('B6'),
  'SWIR2': median2015.select('B7'),
}).rename('awel82015');

```

```
var compositeL82015 = ee.Image.cat(median2015,ndvi2015,ndwi2015,awel82015);
```

### **//EQUALIZE PROJECTION AND SPATIAL RESOLUTION USING LANDSAT 8 AS REFERENCE**

```
var l8Projection = median2015.projection();
```

```
var VHpro = compvh2015
```

```
  .reproject(l8Projection, null, 30)
```

```
  .reduceResolution({
```

```
    reducer: ee.Reducer.mean(),
```

```
    maxPixels: 1024
```

```
  });
```

```
var VVpro = compvv2015
```

```
  .reproject(l8Projection, null, 30)
```

```
  .reduceResolution({
```

```
    reducer: ee.Reducer.mean(),
```

```
    maxPixels: 1024
```

```
  });
```

### **////TRAINING SAMPLE & INPUT**

```
var newfc2015 = darat.merge(air).merge(suspen);
```

```
var opt_sar2015 = ee.Image.cat(compositeL82015, VVpro, VHpro);
```

```
var band_opt_sar2015 = ['B2', 'B3', 'B4', 'B5', 'B6', 'B7', 'NDVI', 'NDWI', 'awel82015', 'VH', 'VV'];
```

```
var training2015 = opt_sar2015.select(band_opt_sar2015).sampleRegions({
```

```
  collection : newfc2015,
```

```
  properties : ['landcover'],
```

```
  scale : 30,
```

```
});
```

### **//TRAIN CLASSIFICATION**

```
var classifierl8sar_2015 = ee.Classifier.gmoMaxEnt().train({
```

```
  features:training2015,
```

```
  classProperty: 'landcover',
```

```
  inputProperties: band_opt_sar2015
```

```
});
```

```
var classifierl8sar_2015rf = ee.Classifier.smileRandomForest(50).train({
```

```
  features:training2015,
```

```
  classProperty: 'landcover',
```

```
inputProperties: band_opt_sar2015
```

```
});
```

```
var classifierl8sar_2015rf2 = ee.Classifier.smileRandomForest(80).train({
```

```
  features:training2015,
```

```
  classProperty: 'landcover',
```

```
  inputProperties: band_opt_sar2015
```

```
});
```

```
//RUN CLASSIFICATION 2015
```

```
var classified_2015 = opt_sar2015.select(band_opt_sar2015).classify(classifierl8sar_2015);
```

```
var classified_2015rf = opt_sar2015.select(band_opt_sar2015).classify(classifierl8sar_2015rf);
```

```
var classified_2015rf2 = opt_sar2015.select(band_opt_sar2015).classify(classifierl8sar_2015rf2);var newwfc2015 =  
darat.merge(air).merge(suspen);
```

# GOOGLE EARTH ENGINE SCRIPT FOR SEA AND LAND CLASSIFICATION FOR 2019 USING LANDSAT 8 AND SENTINEL 1

## //LOAD SENTINEL 1

```
var collectionVV1 = ee.ImageCollection('COPERNICUS/S1_GRD')

    .filter(ee.Filter.eq('instrumentMode', 'IW'))

    .filter(ee.Filter.listContains('transmitterReceiverPolarisation', 'VV'))

    .filter(ee.Filter.eq('orbitProperties_pass', 'DESCENDING'))

    .filterMetadata('resolution_meters', 'equals', 10)

    .filterBounds(jawatimur)

    .select('VV')

    .map(function(image){return image.clip(jawatimur)});
```

```
var collectionVH = ee.ImageCollection('COPERNICUS/S1_GRD')

    .filter(ee.Filter.eq('instrumentMode', 'IW'))

    .filter(ee.Filter.listContains('transmitterReceiverPolarisation', 'VH'))

    .filter(ee.Filter.eq('orbitProperties_pass', 'DESCENDING'))

    .filterMetadata('resolution_meters', 'equals', 10)

    .filterBounds(jawatimur)

    .select('VH')

    .map(function(image){return image.clip(jawatimur)});
```

## //APPLY SPECKLE FILTER VV (focal median)

```
var filterSpeckles = function(img) {

    var vv = img.select('VV') //select the VV polarization band

    var vv_smoothed = vv.focal_median(50,'circle','meters').rename('VV_Filtered') //Apply a focal median filter

    return img.addBands(vv_smoothed) // Add filtered VV band to original image

};

var filterSpeckles2 = function(img) {

    var vh = img.select('VH') //select polarization band

    var vh_smoothed = vh.focal_median(50,'circle','meters').rename('VV_Filtered') //Apply a focal median filter

    return img.addBands(vh_smoothed) // Add filtered Vh band to original image

};
```

## // filter date (2015) to speckle-noise-filtered data and add median value represents entire year image

```
var S1vv = collectionVV1.map(filterSpeckles);
```

```

var vv2019 = S1vv.filterDate('2019-01-01', '2020-01-01');
var compvv2019 = vv2019.median();
var S1vh = collectionVH.map(filterSpeckles2);
var vh2019 = S1vh.filterDate('2019-01-01', '2020-01-01');
var compvh2019 = vh2019.median();

```

### //CLOUD MASKING LANDSAT 8

```

// Function to cloud mask from the pixel QA band of Landsat 8 SR data.

function maskL8sr(image) {

// Bits 3 and 5 are cloud shadows and clouds, respectively.

var cloudShadowBitMask = 1 << 3;

var cloudsBitMask = 1 << 5;

// Get the pixel QA band.

var qa = image.select('pixel_qa');

// Both flags should be set to zero, indicating clear conditions.

var mask = qa.bitwiseAnd(cloudShadowBitMask).eq(0)

.and(qa.bitwiseAnd(cloudsBitMask).eq(0));

// Return the masked image, scaled to reflectance, without the QA bands.

return image.updateMask(mask).clip(jawatimur).divide(10000)

.select("B[0-9]*")

.copyProperties(image, ["system:time_start"]);

}

```

### // LOAD LANDSAT 8

```

var landsat = ee.ImageCollection('LANDSAT/LC08/C01/T1_SR')

.filterBounds(jawatimur)

.map(maskL8sr);

var landsat2019 = landsat.filterDate('2019-01-01', '2020-01-01');

    print(landsat2019);

var median2019 = landsat2019.median();

var ndvi2019 = median2019.normalizedDifference(['B5', 'B4']).rename('NDVI');

var ndwi2019 = median2019.normalizedDifference(['B3', 'B5']).rename('NDWI');

var awel82019 = median2019.expression('4 * (GREEN - SWIR1) - ( 0.25 * NIR ) + (2.75 * SWIR2)', {

    'GREEN': median2019.select('B3'),

    'NIR': median2019.select('B5'),

```

```

'SWIR1': median2019.select('B6'),
'SWIR2': median2019.select('B7'),
}).rename('awel82019');
var compositeL82019 = ee.Image.cat(median2019,ndvi2019,ndwi2019,awel82019);

```

### **//EQUALIZE PROJECTION AND SPATIAL RESOLUTION USING LANDSAT 8 AS REFERENCE**

```

var l8Projection = median2019.projection();
var VHpro2 = compvh2019
    .reproject(l8Projection, null, 30)
    .reduceResolution({
        reducer: ee.Reducer.mean(),
        maxPixels: 1024
    });
var VVpro2 = compvv2019
    .reproject(l8Projection, null, 30)
    .reduceResolution({
        reducer: ee.Reducer.mean(),
        maxPixels: 1024
    });

```

### **////TRAINING SAMPLE & INPUT**

```

var opt_sar2019 = ee.Image.cat(compositeL82019, VHpro2, VVpro2);
var band_opt_sar2019 = [ 'B2', 'B3', 'B4', 'B5','B6','B7', 'NDVI','NDWI','awel82019', 'VH', 'VV'];
var training_opt_sar2019 = opt_sar2019.select(band_opt_sar2019).sampleRegions({
    collection : newfc2019,
    properties : ['landcover'],
    scale : 30,
    tileScale : 16,
});

```

### **//TRAIN CLASSIFICATION**

```

var classifier2019 = ee.Classifier.gmoMaxEnt().train({
    features:training_opt_sar2019,
    classProperty: 'landcover',
    inputProperties: band_opt_sar2019
});

```

```
var classifier2019rf = ee.Classifier.smileRandomForest(50).train({
  features:training_opt_sar2019,
  classProperty: 'landcover',
  inputProperties: band_opt_sar2019
});

var classifier2019rf2 = ee.Classifier.smileRandomForest(80).train({
  features:training_opt_sar2019,
  classProperty: 'landcover',
  inputProperties: band_opt_sar2019
});

//RUN CLASSIFICATION

var classified2019 = opt_sar2019.select(band_opt_sar2019).classify(classifier2019);
var classified2019rf = opt_sar2019.select(band_opt_sar2019).classify(classifier2019rf);
var classified2019rf2 = opt_sar2019.select(band_opt_sar2019).classify(classifier2019rf2);
```
